# Supplementary material for: Secondary Organic Aerosols from OH Oxidation of Cyclic Volatile Methyl Siloxanes as an Important Si Source in the Atmosphere
Source: Copernicus journal article supplement (doi:10.5194/acp-2021-965), 2021-12-01
Supplement: Supplementary file [file acp-2021-965-AC1-supplement.pdf]

1 Dear Professor Jason Surratt,

2 We welcome the opportunity to revise and clarify our manuscript for publication  
3 in *Atmospheric Chemistry and Physics*. Below is a point-by-point response to the  
4 comments of reviewers.

### 5 **acp-2021-965-RC1**

6 This manuscript prepared by Han et al. describes an investigation of secondary organic  
7 aerosol (SOA) arising from cyclic volatile methyl siloxanes (cVMS). The SOA yield  
8 under a variety of atmospheric conditions was investigated using an oxidative flow tube  
9 reactor (OFR). The authors provided detailed discussions on the effect of NO<sub>x</sub>  
10 concentration, presence of seed, and oxidation lifetime. Chemical composition of the  
11 resulting SOA was monitored with an aerosol mass spectrometer (AMS). Further, the  
12 authors applied the obtained yield in a model to estimate the contribution of cVMS  
13 SOA on the global scale. The scope of the study matches that of ACP. The discussion  
14 and conclusions of the paper were fully justified, and the literary quality of the  
15 manuscript is outstanding. I highly recommend publication in ACP. My comments  
16 below can be considered only technical.

17 **Re:** We thank you for the positive comments.

18  
19 One thing that I feel is missing from the current manuscript is a brief discussion on the  
20 mechanism of OH reaction with cVMS. This shouldn't take more than a few sentences  
21 or a short paragraph. In addition to H-abstraction on the -CH<sub>3</sub> groups, does OH undergo  
22 any reaction unique to e.g., O-Si bonds? Pieces of mechanistic information are provided  
23 in line 265 - 268, but it is hard for the readers to gauge whether that is generic OH  
24 chemistry or something unique to cVMS.

25 **Re:** The initial step of OH radicals oxidation can be considered as OH abstracting a H  
26 atom from the methyl groups on the -Si-O- ring of cVMS to form Si-containing radicals,  
27 which may generate OH and CH<sub>2</sub>OH substitution products, such as silanol and silyl  
28 methanol (Wu and Johnston, *J. Am. Soc. Mass Spectrom.*, 2016, 27, 402-409; Alton and  
29 Browne, *Environ. Sci. Technol.*, 2020, 54, 5992-5999). Such Si-containing products

30 may partition into SOA and result in an appearance of  $C_xH_yO_zSi_n$  ions in the AMS mass  
31 spectra, thereby decreasing the ratio of Si/O (D5: 0.53; D6: 0.72) at initial stage.  
32 Notably, one previous study reported that one of oxidation products of D5, 1-  
33 hydroxynonamethylcyclopentasiloxane ( $D_4TOH$ ), has been detected in ambient  
34 particulates (Milani et al., *Atmos. Environ.*, 2021, 246, 118078). As the reaction  
35 progressed, the Si-O bonds may be cleaved from OH radical attack, which may reduce  
36 the number of O atoms, leading to an increase of Si/O with PA. To clearly explain the  
37 reaction mechanism of OH with cVMS, the related description has been revised in  
38 Lines 281-289 in the revised manuscript.

39

40 [Figure S6b - It is a little counterintuitive that the Si/O ratio continued to rise during](#)  
41 [photooxidation. The number of Si in cVMS is fixed, while the molecule should be](#)  
42 [continuously oxidized. So Si/O should be decreasing as oxidation proceeds? The](#)  
43 [authors' discussion from line 259 to 270 did not really explain why Si/O was rising](#)  
44 [continuously.](#)

45 **Re:** The generation of OH and  $CH_2OH$  substitution products, such as silanol and silyl  
46 methanol, may partition into SOA and result in an appearance of  $C_xH_yO_zSi_n$  ions in the  
47 AMS mass spectra, thereby decreasing the ratio of Si/O (D5: 0.53; D6: 0.72) at initial  
48 stage (Wu and Johnston, *J. Am. Soc. Mass Spectrom.*, 2016, 27, 402-409; Alton and  
49 Browne, *Environ. Sci. Technol.*, 2020, 54, 5992-5999). As the reaction progressed, the  
50 Si-O bonds may be cleaved from OH radical attack, which may reduce the number of  
51 O atoms, leading to an increase of Si/O with PA. The related explanation has been given  
52 in Lines 283-289 in the revised manuscript.

53 [Line 151 - the acronym, PTR-ToF-MS is already introduced previously.](#)

54 **Re:** The acronym of PTR-ToF-MS has been used in Line 156 in the revised manuscript.

55

56

57

**acp-2021-965-RC2**

58 **Major Comment**

59 The study was conducted to measure the formation of secondary organic aerosols  
60 (SOAs) during OH oxidation of cyclic volatile methylsiloxanes (cVMS) in an oxidation  
61 flow reactor (OFR). While the measured data of SOA formation was consistent with  
62 other published results obtained similar OFRs, the authors assumed that the results of  
63 OFRs would be used to determine the SOA formation in the real atmosphere. However,  
64 the assumption was proved incorrect by an earlier study by Charan et al. (2021). Their  
65 work was cited in Introduction of the current manuscript, but the main result of the  
66 paper was completely ignored (not mentioned/discussed). Charan et al. (2021)  
67 supported that the yield of SOA depended strongly on OH concentration and organic  
68 aerosol mass concentration (related to initial D5 concentration) among several  
69 experimental parameters (e.g., OH concentration, OH exposure, aerosol seed, NO<sub>x</sub>,  
70 initial D5 concentration, reactor type). They also claimed that the formation of  
71 secondary aerosols is fairly small (<5% or more likely <1%) under environmentally  
72 relevant conditions (i.e., low OH and VMS concentrations). Thus, a large chamber  
73 might be a good option (rather than OFRs) to maintain environmental-relevant  
74 conditions and a low surface-to-volume ratio. Note that all the SOA yields from OFRs  
75 were high and in contrast with those from chamber reactors. However, the current  
76 manuscript (by Han et al.) did not discuss any of these important findings. They  
77 asserted SOA yield was dependent on OH exposure and applied the OFR results for the  
78 real atmosphere. Therefore, without providing a strong result against the conclusions  
79 of Charan et al. (2021), the current manuscript was built on an incorrect assumption.  
80 Accordingly, the estimated SOA production rate is not reliable.

81 **Re:** We welcome the opportunity to clarify our paper in this discussion, and respectfully  
82 disagree with the comment that “the estimated SOA production rate is not reliable”.  
83 This comment concerns the suitability of OFR versus chamber for investigating the  
84 yields from cVMS oxidation. This is indeed a generally important discussion topic in  
85 the community, and the differences between OFRs versus chambers have been the  
86 subject of numerous investigations prior to our paper, with varied conclusions with no  
87 clear bias towards the relative merits of either approach. But one clear advantage of  
88 OFRs is their ability to simulate long OH exposures. We are of the opinion that chamber

89 studies generally have difficulties sustaining long OH exposure times, and as such  
90 OFRs are more suitable to address such conditions especially when a compound has  
91 relatively long-life time in the atmosphere. In the case of cVMS, low OH exposure  
92 versus relatively short period of reaction times, such as in the chamber, may indeed  
93 result in a relatively low aerosol yield. However, given the relatively long cVMS life  
94 times in the atmosphere and the continued reaction beyond the chamber reaction times,  
95 one expects continued aerosol production still proceeding that will result in increased  
96 accumulative aerosol yield compared to chamber studies. Such a condition can be  
97 experimentally simulated using OFRs but with difficulties using chambers.

98 This consideration notwithstanding, it should be noted that the *published version* of  
99 the Charan et al. paper (Charan et al., *Atmos. Chem. Phys.*, 2022, 22, 917-928) indicated  
100 that at similar OH concentrations and OH exposures, the D5 SOA yields in the Caltech  
101 Photooxidation Flow Tube (CPOT) and chamber experiments were consistent. There  
102 were previous reports for investigating the differences between chambers and flow  
103 reactors. For example, Lambe et al. (*Atmos. Chem. Phys.*, 2015, 15, 3063-3075) found  
104 small differences between chambers and flow reactors for many systems. Peng et al.  
105 (*Atmos. Chem. Phys.*, 2019, 19, 813-834) studied these two types of reactors using  
106 models, and provided operational recommendations for evaluating the atmospheric  
107 relevance of RO<sub>2</sub> chemistry. Our previous study (Li et al., *Atmos. Chem. Phys.*, 2019,  
108 19, 9715-9731) made a comparison of SOA yields obtained in ECCO-OFR and other  
109 traditional chambers under similar OH exposure, showing that the SOA yields obtained  
110 by two types of reactors were in good agreement. Under a low OH exposure ( $\sim 10^{10}$ -  
111  $10^{11}$  molecules cm<sup>-3</sup> s), the D5 SOA yield (0.01-0.11) obtained here was similar to that  
112 (chamber, 0-0.057; flow tube, 0.018-0.06) measured by Charan et al. (*Atmos. Chem.*  
113 *Phys.*, 2022, 22, 917-928).

114 Our differences with Charan et al. (*Atmos. Chem. Phys.*, 2022, 22, 917-928) are for  
115 high OH exposure conditions both using OFRs. Under a high OH exposure of  $\sim 10^{11}$ -  
116  $10^{12}$  molecules cm<sup>-3</sup> s, the D5 SOA yield of 0.46-0.70 was higher than 0.14-0.35 (flow  
117 tube) reported by Charan et al. (*Atmos. Chem. Phys.*, 2022, 22, 917-928). Here the  
118 differences may be attributed to differences in experimental conditions, such as

119 differences in reactors, wall losses, SOA measurement methods, determination of OH  
120 concentrations, and initial D5 concentrations (Table S5) (Janecek et al., *Atmos. Chem.*  
121 *Phys.*, 2019, 19, 1649-1664; Charan et al., *Atmos. Chem. Phys.*, 2022, 22, 917-928).  
122 Wall losses in particular can be a major factor influencing aerosol yields; our ECCC-  
123 OFR uses a sheath flow to minimize such an artefact (Li et al., *Atmos. Chem. Phys.*,  
124 2019, 19, 9715-9731) resulting in higher and more reliable yields than approaches  
125 without such a design. In the revision, we have now included a brief discussion to  
126 include the results from the Charan et al. paper in Lines 200-208, and further in Table  
127 S5 in the revised *Supplement* to show the comparison.

128 When extrapolating laboratory results to the real atmosphere, the relevant OH  
129 concentrations and exposures should be understood carefully, as suggested by Charan  
130 et al. (*Atmos. Chem. Phys.*, 2022, 22, 917-928). As we all know, one important  
131 advantage of OFR is to simulate up to several weeks of OH exposures. Considering the  
132 half-life of cVMS, the OH exposures on the order of  $10^{12}$  molecules  $\text{cm}^{-3}$  s are also  
133 environmentally relevant (Charan et al., *Atmos. Chem. Phys.*, 2022, 22, 917-928).  
134 Studies have predicted the SOA formation based on ambient SOA precursors and yields  
135 obtained from OFR (Palm et al., *Atmos. Chem. Phys.*, 2018, 18, 467-493; Jokinen et al.,  
136 *Proc. Natl. Acad. Sci. U S A.*, 2015, 112, 7123-7128), further strengthening the  
137 argument in favor of OFRs.

138

139 [The calculation of cVMS-SOA concentration \(in Eq. 4\) is not clear. The equation needs](#)  
140 [the amount of lost of cVMS, but the quantity was not measured or published. See more](#)  
141 [in Minor Comment below.](#)

142 **Re:** The reacted cVMS in the atmospheric environment is estimated from  
143  $C_{\text{cVMS}} \times \Delta C_{\text{cVMS}} / C_{\text{in-cVMS}}$ , based on assumptions that the lost cVMS ratio is not affected  
144 by the cVMS concentration and the background  $C_{\text{cVMS-SOA}}$  is zero. The values of lost  
145 cVMS ( $\Delta C_{\text{cVMS}}$ ) were obtained by the PTR-MS measurements, and they have been  
146 provided in Table S7 (i.e., Table R2) in the revised *Supplement*.

147

148 [The manuscript states that the number and mass size distribution of aerosols was](#)

149 monitored using a scanning mobility particle sizer (SMPS), but no data was provided  
150 and discussed except the statement that the data was used for calculation of effective  
151 aerosol densities. The results would be helpful to understand the characteristics of SOA  
152 formation under different conditions.

153 **Re:** Based on the SPMS data, the number and mass size distributions of aerosols (D5  
154 SOA as an example) were added in Figure S2 (i.e., Figure R1) in the revised *Supplement*.  
155 Figure S2 (i.e., Figure R1) shows that small particles dominated in the number, while  
156 large ones were prominent in the mass. Compared to the size distributions of D5 SOA  
157 in low-NO<sub>x</sub> experiments (Figure. S2a), the mode diameters of SOA increased for both  
158 number and mass size distributions under high-NO<sub>x</sub> conditions (Figure. S2b), which  
159 suggests that larger particles are dominant in D5 SOA generated in high-NO<sub>x</sub>  
160 experiments. The related discussions have been added in Lines 175-180 in the revised  
161 manuscript.

162

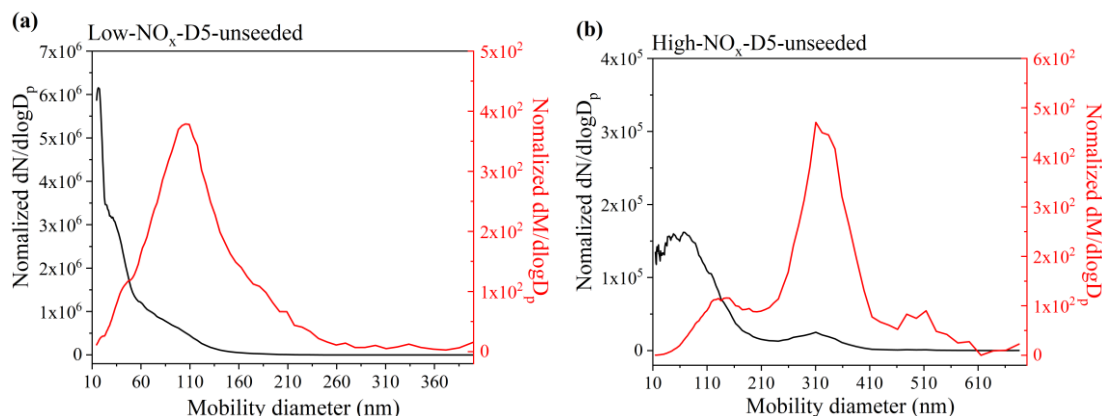

163

164 Figure R1. Number and mass size distributions of D5 SOA measured by SMPS at OH  
165 exposure of  $9.0 \times 10^{11}$  molecules cm<sup>-3</sup> s under low-NO<sub>x</sub> (a) and high-NO<sub>x</sub> (b) conditions.

166

### 167 **Minor Comment**

168 L51-53: Is this (scarce knowledge) still valid? There have been many studies published  
169 since the reference you cited.

170 **Re:** It has been modified in Lines 51-53 in the revised manuscript as shown below:

171 “The legislative actions notwithstanding, knowledge of environmental behavior of  
172 cVMS still needs to be further deepened as compared to their applications and economic

173 significance”.

174

175 L135 & Table S2: Based on my extra calculations, the initial concentration range (i.e.,  
176 20-40 ppb & 20-25 ppb in Table S3) is equivalent to ~10,000 times greater than  
177 environmental concentrations or similar to the values of Janecheck et al. (2019). See  
178 Table S2. The authors should note that the concentrations are high enough to increase  
179 potential uncertainty in the extrapolation to the environmental concentrations. This  
180 manuscript does not provide individual initial concentrations for each of the cVMS  
181 species, but it would be helpful with the data.

182 **Re:** The initial concentrations for each of the cVMS species have been provided in  
183 Table S2 (i.e., Table R1) in the revised *Supplement*. It should be noted that these were  
184 far greater than environmental concentrations, which may cause potential uncertainty  
185 in the extrapolation to the atmospheric conditions. This has been described in Lines  
186 356-360 in the revised manuscript.

187

Table R1. Initial concentration of cVMS

| cVMS | Low-NO <sub>x</sub> experiments (ppb) |        | High-NO <sub>x</sub> experiments (ppb) |        |
|------|---------------------------------------|--------|----------------------------------------|--------|
|      | unseeded                              | seeded | unseeded                               | seeded |
| D3   | 19-21                                 | 18-20  | 38-43                                  | 42-46  |
| D4   | 27-35                                 | 30-33  | 25-31                                  | 25-33  |
| D5   | 18-26                                 | 27-30  | 36-41                                  | 30-38  |
| D6   | 19-28                                 | 25-30  | 24-30                                  | 26-32  |

188

189 L190 (&L29): This study claims that the production of SOA is dependent on OH  
190 exposure. However, this is partially true in the limit of OFR experiments. In contrast,  
191 Charan et al. (2021) discovered that OH radical concentrations are more important than  
192 OH exposure considering all experiment results with OFR and chamber reactors. If the  
193 latter is valid, it's better to use OH radical concentrations for the x-axis rather than  
194 photochemical age as the initial cVMS concentrations were in a relatively narrow range.

195 **Re:** It should be pointed out that the comparison on how OH concentration versus

196 exposure affects SOA yields has been removed in the published version of Charan et al.  
197 (*Atmos. Chem. Phys.*, 2022, 22, 917-928). In fact, the OH exposure (i.e., photochemical  
198 age) is positively correlated with the OH concentration due to the constant resident time  
199 of gas in the ECCC-OFR. The use of OH exposure (i.e., photochemical age) is a typical  
200 way for OFR experiments (Tengyu Liu et al., *Atmos. Chem. Phys.*, 2018, 18, 5677-5689;  
201 Janecek et al., *Atmos. Chem. Phys.*, 2019, 19, 1649-1664). As for us, it is better to use  
202 OH exposure as the x-axis, which is convenient to compare with results from other  
203 literatures.

204

205 [L255-256: This is under unseeded conditions. Please explain why there were more](#)  
206 [productions under seeded conditions at earlier PAs?](#)

207 **Re:** As shown in Figure 3, the initial fractions of  $C_xH_y$  in seeded experiments were  
208 larger than those in unseeded experiments, which may be related to the volatility of  
209 species containing  $C_xH_y$  that may be more easily deposited in the presence of seeds.  
210 This has been given in Lines 300-301 in the revised manuscript.

211

212 [L321-322: The estimation would not be valid based on this study that used OFRs. See](#)  
213 [Charan et al. \(2021\) for the detailed discussion.](#)

214 **Re:** The responses to the first major comment have clarified the validity of the  
215 estimation. It should be noted that in the recently *published version* of Charan et al.  
216 (*Atmos. Chem. Phys.*, 2022, 22, 917-928) the CPOT OFR was also used to support their  
217 conclusion. Briefly, when extrapolating laboratory results to real atmosphere, the  
218 relevant OH concentrations and exposures should be understood carefully, as suggested  
219 by Charan et al. (*Atmos. Chem. Phys.*, 2022, 22, 917-928). As we all know, one  
220 important advantage of OFR is to simulate up to several weeks of OH exposure.  
221 Considering the half-life of cVMS, the OH exposures on the order of  $10^{12}$  molecules  
222  $cm^{-3} s$  are also environmentally relevant (Charan et al., *Atmos. Chem. Phys.*, 2022, 22,  
223 917-928). Additionally, previous studies have predicted the SOA formation based on  
224 ambient SOA precursors and yields obtained from OFR (Palm et al., *Atmos. Chem.*  
225 *Phys.*, 2018, 18, 467-493; Jokinen et al., *Proc. Natl. Acad. Sci. U S A.*, 2015, 112, 7123-



226 7128), further demonstrating the usefulness of OFR in investigating reactions relevant  
 227 to the atmosphere.

228

229 L323,330: There should be differences between  $C_{cVMS}$  and  $\Delta C_{cVMS}$ . I assume SOA  
 230 concentrations were calculated based on  $C_{cVMS}$ , not  $\Delta C_{cVMS}$ . Eq.4 is valid only when  
 231  $C_{cVMS} = C_{in-cVMS}$  and background  $C_{cVMS-SOA}=0$ . Thus, there should be more clarification.  
 232 In addition, extrapolation should be highly uncertain due to 4 orders-of-magnitude  
 233 differences of concentrations and overestimated SOA yields.

234 **Re:** The reacted cVMS in the atmospheric environment is estimated from  
 235  $C_{cVMS} \times \Delta C_{cVMS} / C_{in-cVMS}$ , based on assumptions that the lost cVMS ratio is not affected  
 236 by the cVMS concentrations and the background  $C_{cVMS-SOA}$  is zero. Although there may  
 237 be some uncertainties in extrapolating our results to the real atmosphere, such as larger  
 238 cVMS concentrations and SOA yields, our extrapolations may provide an upper limit  
 239 for evaluating cVMS SOA. This has been described in Lines 356-360 in the revised  
 240 manuscript.

241

242 L332-333: Not clear what values were used in this study. The values were not directly  
 243 measured.

244 **Re:** The values of  $\Delta C_{cVMS} / C_{in-cVMS}$  were obtained by the PTR-MS measurements, and  
 245 they have been provided in Table S7 (i.e., Table R2) in the revised *Supplement*.

246 Table R2. The values of  $C_{in-cVMS}$  and  $\Delta C_{cVMS}$  in Equation 4.

| cVMS | Low-NO <sub>x</sub> -unseeded-14.2 d                           |                                                                 | High-NO <sub>x</sub> -seeded-8.5 d                             |                                                                 |
|------|----------------------------------------------------------------|-----------------------------------------------------------------|----------------------------------------------------------------|-----------------------------------------------------------------|
|      | Initial concentration ( $C_{in-cVMS}$ , $\mu\text{g m}^{-3}$ ) | Lost concentration ( $\Delta C_{cVMS}$ , $\mu\text{g m}^{-3}$ ) | Initial concentration ( $C_{in-cVMS}$ , $\mu\text{g m}^{-3}$ ) | Lost concentration ( $\Delta C_{cVMS}$ , $\mu\text{g m}^{-3}$ ) |
| D3   | 186.83                                                         | 156.99                                                          | 392.56                                                         | 258.27                                                          |
| D4   | 386.42                                                         | 327.30                                                          | 391.84                                                         | 305.99                                                          |
| D5   | 371.66                                                         | 371.66                                                          | 557.73                                                         | 445.59                                                          |
| D6   | 476.12                                                         | 453.72                                                          | 566.47                                                         | 456.72                                                          |

247

248 L617-619: Check this reference: not used.

249 **Re:** It has been added in Line 51 in the revised manuscript.

250

251

### acp-2021-965-RC3

252 The manuscript by Han et al describes several cVMS aerosol yield experiments in an  
253 oxidation flow reactor (OFR). They use their derived yields to make estimates of  
254 cVMS-derived SOA at various locations. cVMS chemistry and aerosol yield is an open  
255 question in the field and the results are of interest to the community. However, I have  
256 several major comments that I would like to see addressed before I could recommend  
257 publication.

258 **Re:** We welcome the opportunity to further clarify and improve our paper.

259

#### Major Comments

261 The results of this study need to be discussed in the context of Charan et al., (2021).  
262 Charan et al. (2021) found that the aerosol yield for D5 oxidation varied with the OH  
263 exposure in an unusual way. I note that when considering the Charan et al., (2021) work,  
264 it would be prudent to wait for the ACP version of the manuscript as several points of  
265 discussion regarding possible explanations of the differing yields were modified  
266 following public discussion. A particular result from Charan et al. (2021) that should be  
267 discussed in the context of the current study is that OFR experiments led to higher SOA  
268 yields than environmental chamber experiments.

269 **Re:** The *published version* of Charan et al. (*Atmos. Chem. Phys.*, 2022, 22, 917-928)  
270 showed that at similar OH concentrations and OH exposures, the D5 SOA yields in the  
271 Caltech Photooxidation Flow Tube (CPOT) and chamber experiments were consistent.

272 Under a low OH exposure ( $\sim 10^{10}$ - $10^{11}$  molecules  $\text{cm}^{-3}$  s), the D5 SOA yield (0.01-  
273 0.11) obtained here was similar to that (chamber, 0-0.057; flow tube, 0.018-0.06)  
274 measured by Charan et al. (*Atmos. Chem. Phys.*, 2022, 22, 917-928). However, under a  
275 high OH exposure of  $\sim 10^{11}$ - $10^{12}$  molecules  $\text{cm}^{-3}$  s, the D5 SOA yield of 0.46-0.70 was

276 higher than 0.14-0.35 (flow tube) reported by Charan et al. (*Atmos. Chem. Phys.*, 2022,  
277 22, 917-928), respectively, which may be attributed to differences in experimental  
278 conditions, such as differences in reactors, wall losses, SOA measurement methods,  
279 determination of OH concentrations, and initial D5 concentrations (Table S5)  
280 (Janecek et al., *Atmos. Chem. Phys.*, 2019, 19, 1649-1664; Charan et al., *Atmos. Chem.*  
281 *Phys.*, 2022, 22, 917-928). The results from Charan et al. (*Atmos. Chem. Phys.*, 2022,  
282 22, 917-928) have been cited in Table S5 in the revised *Supplement*. Moreover, a brief  
283 discussion has been added in Lines 200-208 in the revised manuscript.

284

285 Further details about the radical chemistry need to be included in the manuscript. While  
286 information is given on the ratio of  $\text{RO}_2 + \text{NO}$  to  $\text{RO}_2 + \text{HO}_2$  reactions in the high  $\text{NO}_x$   
287 experiments, there is no discussion on how prevalent  $\text{RO}_2 + \text{RO}_2$  reactions were or even  
288 the (not atmospherically relevant)  $\text{RO}_2 + \text{OH}$ . Differences in the fate of the peroxy  
289 radical in the OFR experiments compared to chamber experiments is one possibility  
290 that could explain the Charan et al (2021) results, however, the investigation of  $\text{RO}_2$   
291 fate was beyond the scope of that paper. I encourage the authors to describe the radical  
292 chemistry of these experiments in more detail as it could aid in understanding the  
293 apparent discrepancy between OFR experiments and chambers for this chemical system.

294 **Re:** Although  $\text{RO}_2 + \text{RO}_2$  reactions cannot be totally ignored compared to  $\text{RO}_2 + \text{HO}_2$   
295 and  $\text{RO}_2 + \text{NO}$  reactions, their roles may be minor due to the low concentration of SOA  
296 precursors (cVMS, 18-46 ppb) according to the study of Lambe et al. (*Atmos. Meas.*  
297 *Tech.*, 2017, 10, 2283-2298). Peng et al. (*Atmos. Chem. Phys.*, 2019, 19, 813-834) have  
298 illustrated that when at low precursor concentrations, the roles of  $\text{RO}_2 + \text{RO}_2$  are minor  
299 or negligible in OFR, where  $\text{N}_2\text{O}$  was used to achieve high- $\text{NO}_x$  conditions. Our  
300 previous model results have also demonstrated that the dominant fate of  $\text{RO}_2$  was the  
301 reaction with NO in the ECCO-OFR under high- $\text{NO}_x$  conditions (Li et al., *Environ. Sci.*  
302 *Technol.*, 2019, 53, 14420-14429), implying the minimal role of  $\text{RO}_2 + \text{RO}_2$  reactions.  
303 As reported by Peng et al. (*Atmos. Chem. Phys.*, 2019, 19, 813-834), the relative  
304 importance of  $\text{RO}_2 + \text{OH}$  is generally negatively correlated with the injection of  $\text{N}_2\text{O}$   
305 in OFR, which may be attributed to the suppressing effect of  $\text{NO}_x$  on OH and the

306 increasing role of RO<sub>2</sub> + NO. The related discussion about the radical chemistry has  
307 been added in Lines 147-152 in the revised manuscript.

308

309 Given the prevalence of cVMS, it is easy for contamination to occur. I would like to  
310 see more information on control experiments that were performed to check for  
311 contamination and possible impacts on cVMS yields. Additionally, I think the  
312 manuscript would benefit from including more examples (SI is ok) of the measurements.  
313 In particular, I would like to see some examples of the SMPS data and AMS time series  
314 absolute values (not in terms of fraction). The SMPS data in particular should be  
315 included as it is central in the yield calculation.

316 **Re:** Control experiments were performed under both low and high-NO<sub>x</sub> conditions,  
317 where the aerosol mass concentration (background values) in the absence of cVMS was  
318 measured by SMPS, as shown in Table S3 (i.e., Table R3) in the revised *Supplement*.  
319 The background values were subtracted when calculating the cVMS SOA yields. The  
320 revised descriptions have been added in Lines 171-172 in the revised manuscript.

321 Taking D5 in low-NO<sub>x</sub> experiments as an example, the mass concentrations of D5  
322 SOA measured by SMPS under unseeded conditions were shown in Table S4 (i.e., Table  
323 R4) in the revised *Supplement*. Moreover, the number and mass size distributions of D5  
324 SOA measured by SMPS were added in Figure S2 (i.e., Figure R1) in the revised  
325 *Supplement*. The related discussions have been added in Lines 175-180. The AMS time  
326 series of D5 SOA in low-NO<sub>x</sub> experiments under unseeded conditions were also shown  
327 in Figure S3 (i.e., Figure R2) in the revised *Supplement*. This has been described in  
328 Lines 180-182 in the revised manuscript.

329

330 Table R3. Background values of SMPS at different OH exposures in low and high-  
331 NO<sub>x</sub> experiments without cVMS.

| Low-NO <sub>x</sub> experiments |                        |                                   | High-NO <sub>x</sub> experiments |                        |                                    |                                    |
|---------------------------------|------------------------|-----------------------------------|----------------------------------|------------------------|------------------------------------|------------------------------------|
| OH exposure                     | Equivalent photochemic | Background d (μg/m <sup>3</sup> ) | OH exposure                      | Equivalent photochemic | Background d (μg/m <sup>3</sup> )- | Background d (μg/m <sup>3</sup> )- |

| ( $\times 10^{12}$<br>molecule<br>s $\text{cm}^{-3}$ s) | al age (days) |      | ( $\times 10^{12}$<br>molecule<br>s $\text{cm}^{-3}$ s) | al age (days) | unseeded | seeded |
|---------------------------------------------------------|---------------|------|---------------------------------------------------------|---------------|----------|--------|
| 0.05                                                    | 0.42          | 0.51 | 0.08                                                    | 0.63          | 0.15     | 2.74   |
| 0.14                                                    | 1.10          | 1.55 | 0.22                                                    | 1.71          | 0.33     | 5.37   |
| 0.26                                                    | 2.00          | 2.01 | 0.34                                                    | 2.64          | 0.32     | 6.84   |
| 0.35                                                    | 2.67          | 2.38 | 0.45                                                    | 3.45          | 0.39     | 7.44   |
| 0.43                                                    | 3.28          | 2.25 | 0.61                                                    | 4.69          | 0.37     | 10.91  |
| 0.50                                                    | 3.86          | 2.70 | 0.82                                                    | 6.36          | 0.58     | 12.34  |
| 0.60                                                    | 4.66          | 3.50 | 0.90                                                    | 6.94          | 0.41     | 12.21  |
| 0.69                                                    | 5.30          | 3.73 | 1.10                                                    | 8.46          | 0.98     | 13.61  |
| 0.90                                                    | 6.95          | 3.86 |                                                         |               |          |        |
| 1.16                                                    | 8.96          | 5.19 |                                                         |               |          |        |
| 1.32                                                    | 10.15         | 6.17 |                                                         |               |          |        |
| 1.67                                                    | 12.88         | 7.24 |                                                         |               |          |        |
| 1.85                                                    | 14.24         | 7.81 |                                                         |               |          |        |

332

333

334 Table R4. The mass concentrations of D5 SOA at different OH exposures under  
 335 unseeded conditions in low-NO<sub>x</sub> experiments.

| OH exposure<br>( $\times 10^{12}$ molecules $\text{cm}^{-3}$ s) | Equivalent photochemical age<br>(days) | Low-NO <sub>x</sub> -unseeded-D5 SOA<br>( $\mu\text{g}/\text{m}^3$ ) |
|-----------------------------------------------------------------|----------------------------------------|----------------------------------------------------------------------|
| 0.05                                                            | 0.42                                   | 0.49                                                                 |
| 0.14                                                            | 1.10                                   | 1.83                                                                 |
| 0.26                                                            | 2.00                                   | 8.92                                                                 |
| 0.35                                                            | 2.67                                   | 16.95                                                                |
| 0.43                                                            | 3.28                                   | 25.76                                                                |
| 0.50                                                            | 3.86                                   | 48.86                                                                |
| 0.60                                                            | 4.66                                   | 68.65                                                                |

|      |       |        |
|------|-------|--------|
| 0.69 | 5.30  | 97.70  |
| 0.90 | 6.95  | 169.74 |
| 1.16 | 8.96  | 228.76 |
| 1.32 | 10.15 | 253.56 |
| 1.67 | 12.88 | 282.73 |
| 1.85 | 14.24 | 273.61 |

336

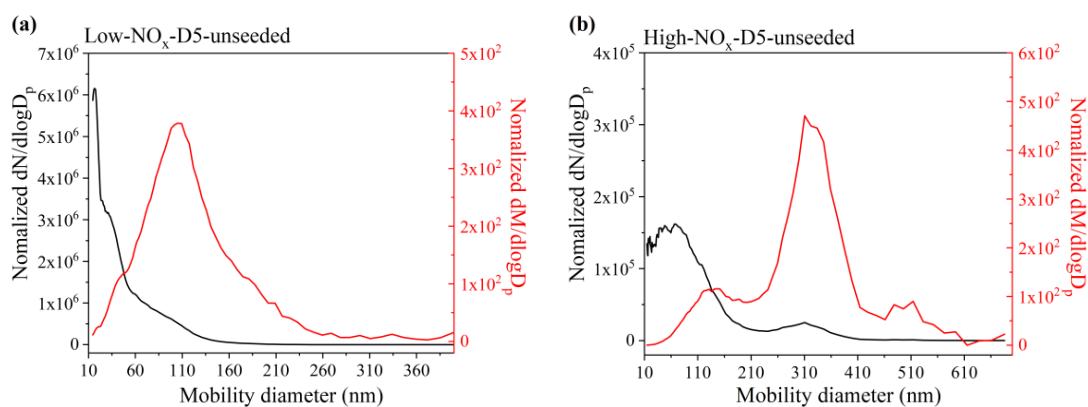

337

338 Figure R1. Number and mass size distributions of D5 SOA measured by SMPS at OH  
 339 exposure of  $9.0 \times 10^{11}$  molecules  $\text{cm}^{-3}$  s under low- $\text{NO}_x$  (a) and high- $\text{NO}_x$  (b)  
 340 conditions.

341

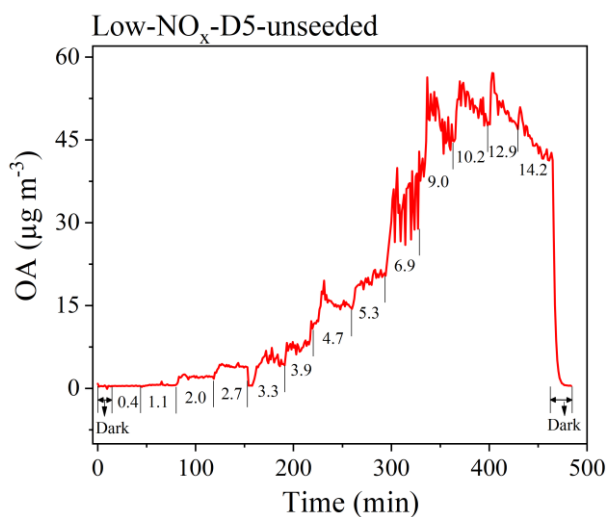

342

343 Figure R2. The AMS time series of D5 SOA in low- $\text{NO}_x$  experiments under unseeded  
 344 conditions. The numbers represent the equivalent photochemical age.

345

346 The back of the envelope calculations for the cVMS SOA loadings need to be better  
347 justified. For instance, why is 8.5 days selected for the urban sites? That seems long  
348 considering typical transport times. There should also be discussion of the results of  
349 Milani et al., (2021) and Pennington et al., (2021) and the consistency or not of these  
350 back of the envelope estimates with those studies.

351 **Re:** The atmospheric half-lives of D3-D6 were 6-30 days. The yield at 8.5 equivalent  
352 days was selected to provide an upper limit for evaluating cVMS SOA. This has been  
353 described in Lines 349-350 and 356-360 in the revised manuscript.

354 A discussion with the results of Milani et al. (*Atmos. Environ.*, 2021, 246, 118078)  
355 and Pennington et al. (*Atmos. Chem. Phys.*, 2021, 21, 18247-18261) has been added in  
356 Lines 388-394 in the revised manuscript and presented below.

357 “It was noted that the D5 SOA concentration (13.38-683.57 ng/m<sup>3</sup>) estimated here is  
358 far more than that (0.016-0.206 ng/m<sup>3</sup>) reported by Milani et al., (2021), who obtained  
359 their data using semi-quantified concentrations of D<sub>4</sub>TOH (first-generation D5 SOA  
360 product) extracted from PM<sub>2.5</sub> samples in Atlanta and Houston. The difference may be  
361 mainly attributed to the missing analysis of multi-generation SOA products or dimers  
362 (Wu and Johnston, 2016, 2017). Pennington et al., (2021) utilized the developed CMAQ  
363 model to investigate the concentration of D5 SOA in the urban area of Los Angeles,  
364 and the model data (21 ng/m<sup>3</sup>) was within these values here.”

365

### 366 **Minor Comments**

367 Figure 2 (and analogous SI figure for high NO<sub>x</sub>). Given that the cVMS precursors only  
368 differ in the number of (C<sub>2</sub>H<sub>6</sub>OSi) units, I would have expected to see somewhat more  
369 similar mass spectra from their oxidation products. I find it intriguing how different the  
370 MS are between the experiments and find some of the ions unexpected. For instance,  
371 C<sub>12</sub>H<sub>11</sub>O<sub>2</sub>Si<sub>5</sub><sup>+</sup> from D5 oxidation is intriguing given the addition of C and loss of O from  
372 the parent species. I recognize the electron ionization spectra of complex mixtures can  
373 be challenging and non-intuitive to interpret, but I wonder if the authors have  
374 considered possible explanations for some of these ions and what they might imply for  
375 the identify of oxidation products. Additionally, I wonder if the PTR provides any

376 information on gas-phase oxidation products that is useful.

377 **Re:** We thank the reviewer for this thoughtful comment. Indeed, information buried in  
378 the MS can be very meaningful for understanding the mechanisms of cVMS oxidation  
379 by OH radicals. We have tried to provide possible explanations for these ions when  
380 analyzing mass spectra. However, due to the complexity of the fragments caused by  
381 electron ionization, we admit that it is hard to establish a correlation between these  
382 special fragments and oxidation products only based on the AMS results. Gas-phase  
383 species in PTR-MS are still being analyzed in our further investigation to complete a  
384 study about the kinetics and gas-phase products of the reaction between cVMS and OH  
385 radicals. The PTR-MS may provide some information about the gas-phase species, as  
386 shown in Figure R3. The focus of the current manuscript is on the yields and  
387 compositions of cVMS SOA, rather than gas-phase products and mechanisms of cVMS  
388 oxidated by OH radicals, which are the subject of a continued investigation. Therefore,  
389 the PTR-MS results are not presented in our manuscript.

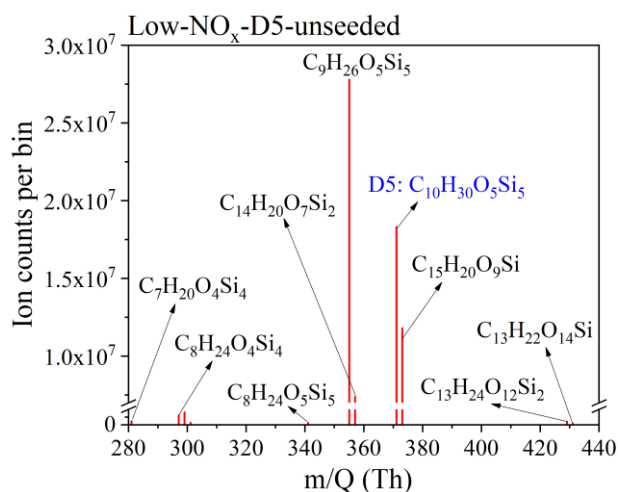

390

391 Figure R3. The mass spectrum of the gas-phase oxidation products of D5 measured  
392 by PTR-MS under low-NO<sub>x</sub> and unseeded conditions.

393

394 Lines 268-270: I would think that continued breaking of Si-O bonds would lead to more  
395 volatile products since after the first bond breaking, it would lead to fragmentation and  
396 thus smaller molecules.

397 **Re:** We agree with your opinion. The related explanation has been modified in Lines  
398 290-291 in the revised manuscript.



399

400 **Technical Comments**

401 Line 70: The conclusion of Alton and Browne, (2020) is more subtle than suggested  
402 here. They suggest that while Cl is minor globally, loss locally (for instance in Los  
403 Angeles) could be more important given the spatial and temporal overlap of cVMS  
404 emissions and sources of Cl (i.e. from ClNO<sub>2</sub>). This is an important distinction if cVMS  
405 yields are high as suggested by this work.

406 **Re:** The text has been modified in Lines 70-71 in the revised manuscript and shown  
407 below: “The loss of cVMS in the atmosphere is slight through O<sub>3</sub> and NO<sub>3</sub> due to their  
408 small reaction rates, and by Cl atoms on account of its low concentration except for the  
409 spatial and temporal overlaps of cVMS emissions and Cl sources.”

410

411 Lines 84-85: “...indicating necessary conditions when extrapolating SOA yields to the  
412 ambient atmosphere.” This sentence does not make sense. Please reword.

413 **Re:** This sentence has been rewritten in Lines 84-86 in the manuscript as  
414 “...emphasizing the importance of the relevant OH concentrations and exposures when  
415 extrapolating these laboratory results or comparing with other studies...”.

416

417 Table S2: Please keep D5 in the same units for all the studies.

418 **Re:** The unit of D5 in Table S5 has been uniformly changed to “ppbv” in the revised  
419 *Supplement*.

420

421 Line 229: Alton and Browne (2020) did not state anything about the relative volatility  
422 of different cVMS oxidation products. The only discussion on volatility concerned wall  
423 loss and that one of the first-generation oxidation products had a lower vapor pressure  
424 than the parent cVMS. Moreover, that vapor pressure is still high enough that it is  
425 unlikely to contribute to SOA except at high loadings. Additionally, they did not report  
426 D6 results.

427 **Re:** This reference has been deleted in Line 245 in the revised manuscript.

428

429 The use of n/z and n/z rather than Si/C and Si/O adds complexity to the paper that I  
430 think is unnecessary. I think it would be easier for the reader to understand the results  
431 if Si/C and Si/O are used.

432 **Re:** “Si/C” and “Si/O” have been used in Lines 276-280 and 331-333 in the revised  
433 manuscript.

434

435 Lines 265-266: This discussion of oxidation as occurring by substitution of one  
436 functional group for another is confusing and misleading. I suggest editing to be more  
437 clear about the chemistry occurring (OH abstracting a H, etc.).

438 **Re:** This discussion has been modified into “The initial step of OH radical oxidation  
439 can be considered as OH abstracting a H atom from the methyl groups on the -Si-O-  
440 ring of the cVMS to form Si-containing radicals, which may generate OH and CH<sub>2</sub>OH  
441 substitution products, such as silanol and silyl methanol (Wu and Johnston, 2016; Alton  
442 and Browne, 2020)”, as shown in Lines 281-284 in the revised manuscript.

443

#### 444 References

445 Alton, M. W. and Browne, E. C.: Atmospheric Chemistry of Volatile Methyl Siloxanes:  
446 Kinetics and Products of Oxidation by OH Radicals and Cl Atoms, *Environ. Sci.*  
447 *Technol.*,  
448 54, 5992–5999, <https://doi.org/10.1021/acs.est.0c01368>, 2020.

449 Charan, S. M., Huang, Y., Buenconsejo, R. S., Li, Q., Cocker III, D. R., and Seinfeld,  
450 J. H.: Secondary Organic Aerosol Formation from the Oxidation of  
451 Decamethylcyclopentasiloxane at Atmospherically Relevant OH Concentrations,  
452 *Atmospheric Chem. Phys. Discuss.*, 1–17, <https://doi.org/10.5194/acp-2021-353>, 2021.

453 Milani, A., Al-Naiema, I. M., and Stone, E. A.: Detection of a secondary organic aerosol  
454 tracer derived from personal care products, *Atmos. Environ.*, 246, 118078,  
455 <https://doi.org/10.1016/j.atmosenv.2020.118078>, 2021.

456 Pennington, E. A., Seltzer, K. M., Murphy, B. N., Qin, M., Seinfeld, J. H., and Pye, H.  
457 O. T.: Modeling secondary organic aerosol formation from volatile chemical products,  
458 *Atmospheric Chem. Phys.*, 21, 18247–18261, <https://doi.org/10.5194/acp-21-18247->

459 2021, 2021.

460 Re: We thank the reviewer for providing these literatures. We have read them carefully  
461 and some of them have been cited and discussed properly in the revised manuscript.

462

463

464 Sincerely yours,

465

466 Chong Han, Professor

467 School of Metallurgy

468 Northeastern University

469 Shenyang 110819, China

470 E-mail: [hanch@smm.neu.edu.cn](mailto:hanch@smm.neu.edu.cn)

471

472 Shao-Meng Li, Chair Professor

473 College of Environmental Sciences and Engineering

474 Peking University

475 Beijing, China 100871

476 E-mail: [shaomeng.li@pku.edu.cn](mailto:shaomeng.li@pku.edu.cn)
